# Supplementary material
Source: PubMed Central journal article supplement (PMC2530899)
Supplement: NIHMS61723-supplement-si20060716_112.pdf [file NIHMS61723-supplement-si20060716_112.pdf]

Differential Sensing of Protein Influences by  
NO and CO Vibrations in Heme Adducts

**- Supporting Information -**

*Mohammed Ibrahim, Changliang Xu and Thomas G. Spiro\**

Department of Chemistry, Princeton University, Princeton, New Jersey 08544

**Table S1.** Key structural parameters and  $S^2$  values calculated by the different DFT functionals in this study, with selected structural information from experiments and other computations for comparison

|                                  | Fe-NO(Å)  | N-O<br>(Å) | Fe-N-O<br>(deg) | Fe-L<br>(Å) | Fe-Np(Å)      | $S^2$ | Ref  |
|----------------------------------|-----------|------------|-----------------|-------------|---------------|-------|------|
| <b>Five-coordinate</b>           |           |            |                 |             |               |       |      |
| <b>Experimental</b>              |           |            |                 |             |               |       |      |
| Fe(TPP)(NO)                      | 1.717(7)  | 1.122(12)  | 149.2(6)        |             | 2.001(3)      |       | 1    |
| Fe(TpivPP)(NO)                   | 1.716(15) | 1.197(9)   | 143.8           |             | 1.981(26)     |       | 2    |
| <Fe(Por)(NO)>                    | 1.728(5)  | 1.168(1)   | 143.4(9)        |             | 2.008(3)      |       | 3    |
| <b>Functional, basis (calc.)</b> |           |            |                 |             |               |       |      |
| B3LYP, VTZ                       | 1.709     | 1.173      | 140.4           |             | 2.0725/2.0037 | 0.84  | t.w. |
| B3PW91, VTZ                      | 1.780     | 1.173      | 142.0           |             | 2.018/2.0023  | 1.42  | t.w. |
| B3P86, VTZ                       | 1.761     | 1.172      | 141.2           |             | 2.0133/1.9959 | 1.31  | t.w. |
| BLYP, VTZ                        | 1.716     | 1.196      | 142.5           |             | 2.0436/2.0154 | 0.77  | t.w. |
| BPW91, VTZ                       | 1.699     | 1.189      | 143.6           |             | 2.0296/2.001  | 0.77  | t.w. |
| BP86, VTZ                        | 1.699     | 1.191      | 143.2           |             | 2.0279/1.9995 | 0.77  | t.w. |
| PW91/STO-TZP                     | 1.704     | 1.182      | 144.8           |             | 2.025/2.002   |       | 4    |
| BP86, TZVP                       | 1.700     | 1.180      | 146.0           |             |               |       | 5    |
| <b>Six-coordinate</b>            |           |            |                 |             |               |       |      |
| <b>Experimental</b>              |           |            |                 |             |               |       |      |
| (N-Melm)Fe(TPP)(NO)              | 1.750(2)  | 1.182(3)   | 137.7(2)        | 2.173(2)    | 2.008(13)     |       | 3    |
| (Py)Fe(TpivPP)(NO)               | 1.742(5)  | 1.194(9)   | 133.4(5)        | 2.260(5)    | 2.009(2)      |       | 3    |
| <(L)Fe(Por)(NO)>                 | 1.752(4)  | 1.174(6)   | 138.5(11)       |             | 2.007         |       | 3    |
| <b>Functional, basis (calc.)</b> |           |            |                 |             |               |       |      |
| B3LYP, VTZ                       | 1.782     | 1.174      | 139.6           | 2.123       | 2.0299/2.02   | 0.86  | t.w. |
| B3PW91, VTZ                      | 1.763     | 1.171      | 140.0           | 2.099       | 2.0196/2.0075 | 0.86  | t.w. |
| B3P86, VTZ                       | 1.757     | 1.171      | 139.6           | 2.080       | 2.0149/2.0027 | 0.85  | t.w. |
| BLYP, VTZ                        | 1.749     | 1.199      | 139.3           | 2.236       | 2.0456/2.0263 | 0.77  | t.w. |
| BPW91, VTZ                       | 1.735     | 1.192      | 139.8           | 2.186       | 2.0315/2.0105 | 0.77  | t.w. |
| BP86, VTZ                        | 1.735     | 1.194      | 139.4           | 2.161       | 2.0304/2.0101 | 0.76  | t.w. |
| PW91/STO-TZP                     | 1.741     | 1.186      | 140.1           | 2.173       | 2.027/2.008   |       | 4    |
| BP86, TZVP                       | 1.730     | 1.190      | 140.0           | 2.180       |               |       | 5    |

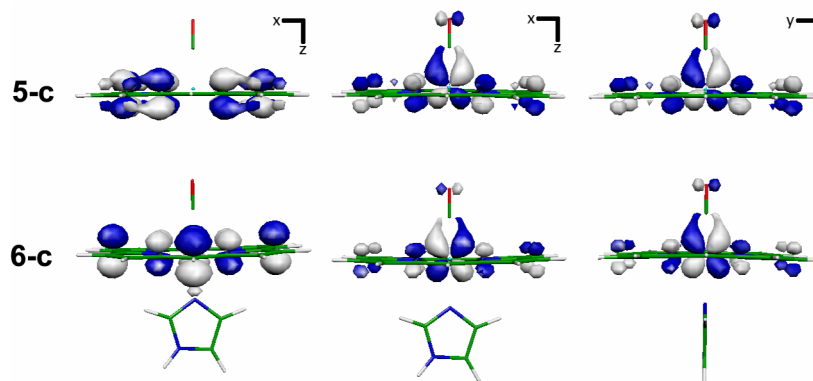

**Figure S1.** Three highest HOMOs of Fe(II)P(CO) and (ImH)Fe(II)P(CO), which correspond to the selected HOMOs of Fe(II)P(NO) and (ImH)Fe(II)P(NO) in Figure 9 in the main article.

**Complete Reference 15:**

Frisch, M. J.; Trucks, G. W.; Schlegel, H. B.; Scuseria, G. E.; Robb, M. A.; Cheeseman, J. R.; Montgomery, Jr., J. A.; Vreven, T.; Kudin, K. N.; Burant, J. C.; Millam, J. M.; Iyengar, S. S.; Tomasi, J.; Barone, V.; Mennucci, B.; Cossi, M.; Scalmani, G.; Rega, N.; Petersson, G. A.; Nakatsuji, H.; Hada, M.; Ehara, M.; Toyota, K.; Fukuda, R.; Hasegawa, J.; Ishida, M.; Nakajima, T.; Honda, Y.; Kitao, O.; Nakai, H.; Klene, M.; Li, X.; Knox, J. E.; Hratchian, H. P.; Cross, J. B.; Bakken, V.; Adamo, C.; Jaramillo, J.; Gomperts, R.; Stratmann, R. E.; Yazyev, O.; Austin, A. J.; Cammi, R.; Pomelli, C.; Ochterski, J. W.; Ayala, P. Y.; Morokuma, K.; Voth, G. A.; Salvador, P.; Dannenberg, J. J.; Zakrzewski, V. G.; Dapprich, S.; Daniels, A. D.; Strain, M. C.; Farkas, O.; Malick, D. K.; Rabuck, A. D.; Raghavachari, K.; Foresman, J. B.; Ortiz, J. V.; Cui, Q.; Baboul, A. G.; Clifford, S.; Cioslowski, J.; Stefanov, B. B.; Liu, G.; Liashenko, A.; Piskorz, P.; Komaromi, I.; Martin, R. L.; Fox, D. J.; Keith, T.; Al-Laham, M. A.; Peng, C. Y.; Nanayakkara, A.; Challacombe, M.; Gill, P. M. W.; Johnson, B.; Chen, W.; Wong, M. W.; Gonzalez, C.; and Pople, J. A. *Gaussian 03*; Gaussian, Inc.: Wallingford, CT, 2004.

**References**

1. Scheidt, W. R.; Frisse, M. E. *J. Am. Chem. Soc.* **1975**, *97*, 17-21.
2. Nasri, H.; Haller, K. J.; Wang, Y.; Hanh, H. B.; Scheidt, W. R. *Inorg. Chem.* **1992**, *31*, 3459 – 3467.
3. Wyllie, G. R. A.; Schulz, C. E.; Scheidt, W. R. *Inorg. Chem.* **2003**, *42*, 5722-5734.
4. Tangen, E.; Svadberg, A.; Ghosh, A. *Inorg. Chem.* **2005**, *44*, 7802-7805.
5. Praneeth, V. K. K.; Neese, F.; Lehnert, N. *Inorg. Chem.* **2005**, *44*, 2570-2572.
